# Supplementary material for: New fluorescence labeling isotactic polypropylenes as a tracer: a proof of concept
Source: Royal Society of Chemistry journal article supplement (doi:10.1039/d2py00302c), 2022-01-01
Supplement: d2py00302c1.pdf [file d2py00302c1.pdf]

## Supporting Information

### **New fluorescence labeling isotactic polypropylenes as a tracer: a proof of concept**

Stefania Pragliola<sup>1\*</sup>, Fabia Grisi<sup>1</sup>, Vissia Vitale<sup>1</sup>, Olga Sacco<sup>1</sup>, and Vincenzo Venditto<sup>1</sup>  
Lorella Izzo<sup>2</sup>, Annalisa Grimaldi<sup>2</sup>, and Nicolò Baranzini<sup>2</sup>

<sup>1</sup> *Università di Salerno, Dipartimento di Chimica e Biologia, and INSTM Research Unit, Via Giovanni Paolo II 132, I-84084 Fisciano, SA, Italy*

<sup>2</sup> *Università degli Studi dell'Insubria, Dipartimento di Biotecnologie e Scienze della Vita, Via J.H. Dunant, 3-21100 Varese, Italy*

## Index

|                                                                                  |             |
|----------------------------------------------------------------------------------|-------------|
| <b>S1.</b> $^1\text{H}$ NMR spectrum of <i>i</i> -PP (run 1)                     | <b>p.3</b>  |
| <b>S2.</b> $^{13}\text{C}$ NMR spectrum of <i>i</i> -PP (run 1)                  | <b>p.3</b>  |
| <b>S3.</b> Methyl region of $^{13}\text{C}$ NMR spectrum of <i>i</i> -PP (run 1) | <b>p. 4</b> |
| <b>S4.</b> $^1\text{H}$ NMR spectrum of P(P- <i>co</i> -PK) (run 2)              | <b>p. 4</b> |
| <b>S5.</b> $^{13}\text{C}$ NMR spectrum of PPK (run 5)                           | <b>p. 5</b> |
| <b>S6.</b> GPC traces of runs 1-5                                                | <b>p. 6</b> |
| <b>S7.</b> X ray diffraction patterns of PPK (run 5).                            | <b>p. 6</b> |
| <b>S8.</b> TGA traces of runs 1-5                                                | <b>p. 7</b> |
| <b>S9.</b> Emission spectrum of PPK (run 5)                                      | <b>p. 8</b> |
| <b>Table S2.</b> P(P- <i>co</i> -PK) $^{13}\text{C}$ NMR Assignments             | <b>p. 9</b> |

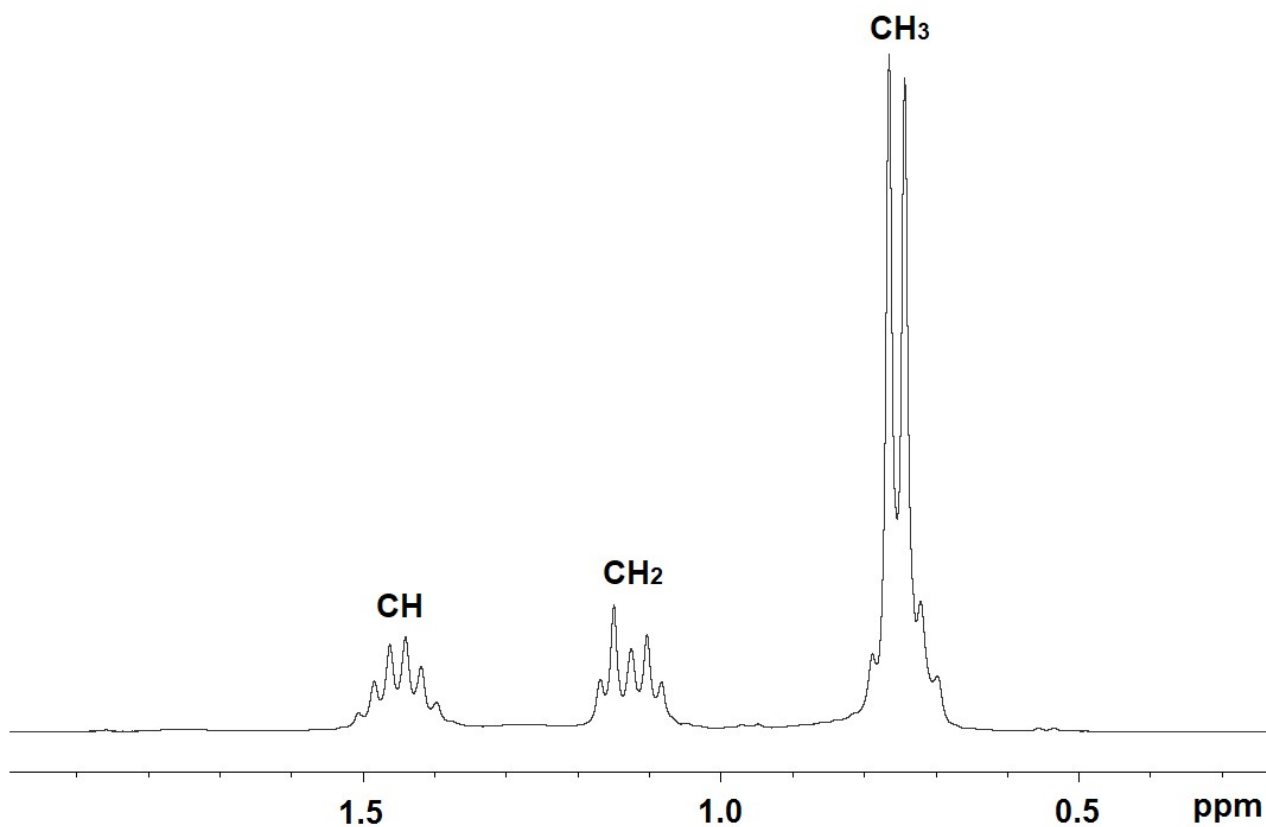

S1.  $^1\text{H}$  NMR spectrum of *i*-PP (run 1) (TCDE solvent, HMDS scale, 100 °C).

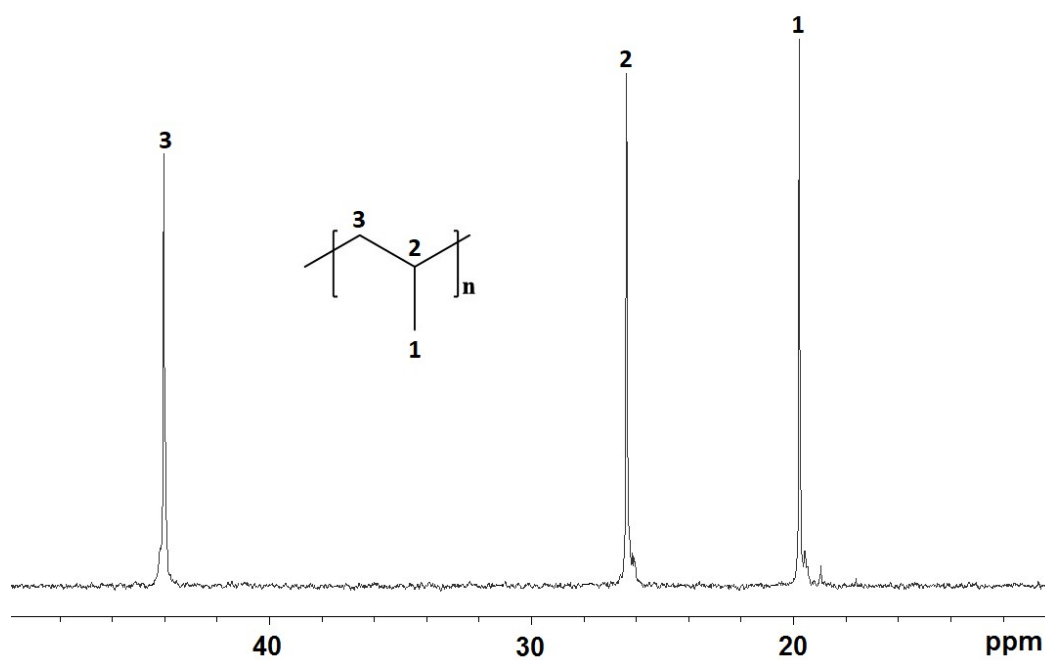

S2.  $^{13}\text{C}$  NMR spectrum of *i*-PP (run 1) (TCDE solvent, HMDS scale, 100 °C).

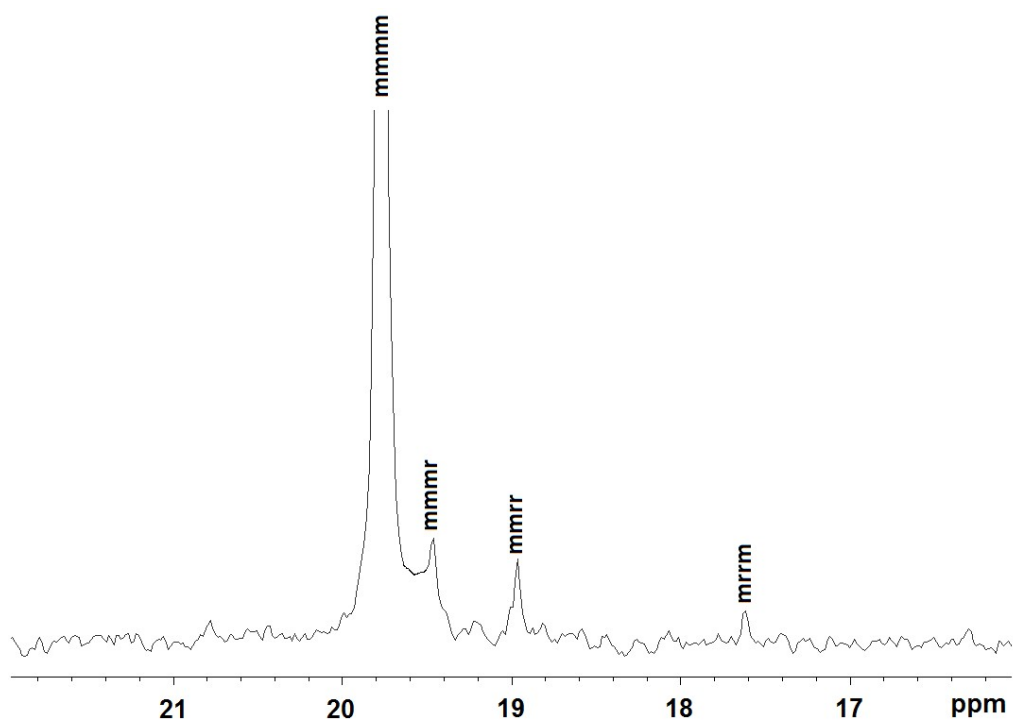

**S3.** Methyl region of  $^{13}\text{C}$  NMR spectrum of *i*-PP (run 1) (TCDE solvent, HMDS scale, 100 °C).

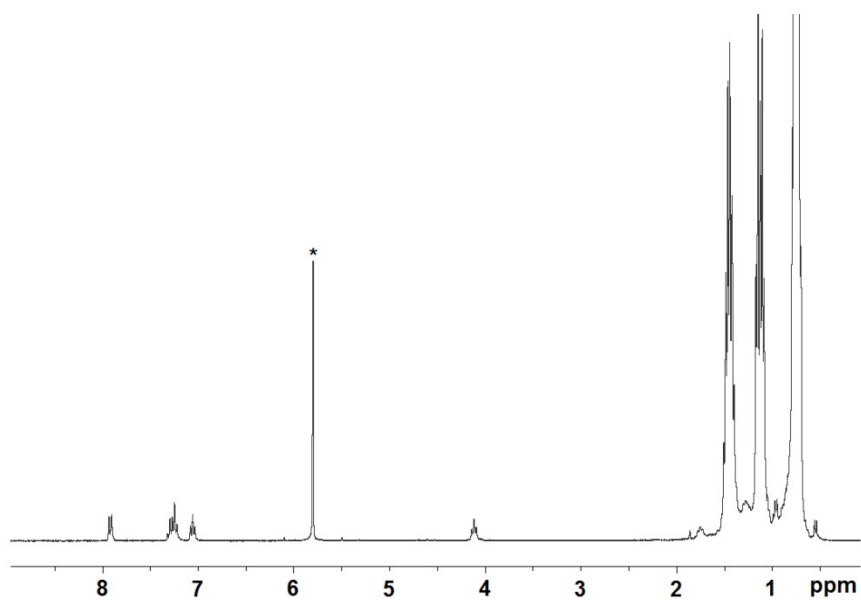

**S4.**  $^1\text{H}$  NMR spectrum of P(P-co-PK) (run 2) (TCDE solvent, HMDS scale, 100 °C).

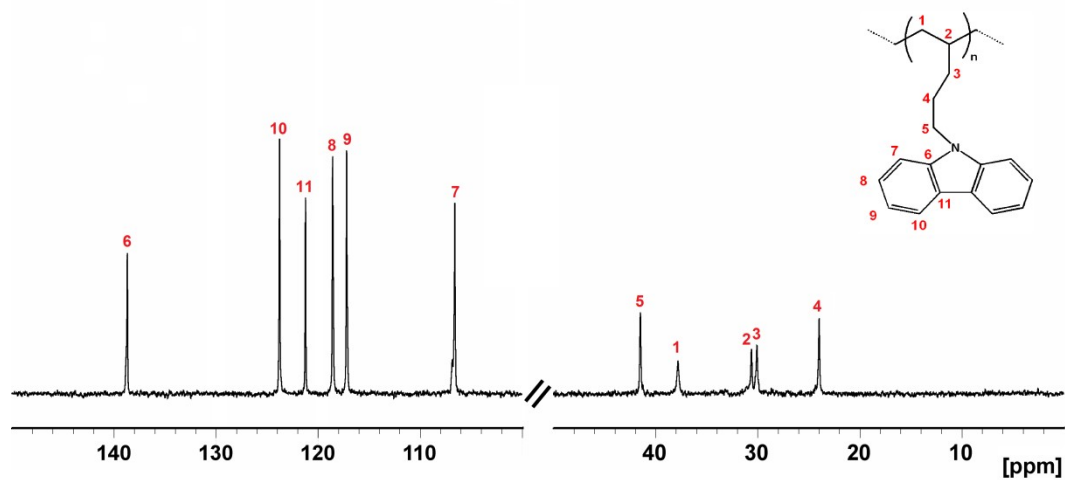

S5. <sup>13</sup>C NMR spectrum of PPK (run 5) (TCDE solvent, HMDS scale, 100 °C).

**Table S1.** <sup>13</sup>C NMR Assignments of Run 5

| Carbon | Chem. Shift<br>(ppm) |
|--------|----------------------|
| C1     | 37.72 <sub>6</sub>   |
| C2     | 30.53 <sub>8</sub>   |
| C3     | 23.94 <sub>6</sub>   |
| C4     | 30.02 <sub>2</sub>   |
| C5     | 41.45 <sub>6</sub>   |
| C6     | 138.63 <sub>9</sub>  |
| C7     | 106.57 <sub>1</sub>  |
| C8     | 118.55 <sub>6</sub>  |
| C9     | 117.17 <sub>7</sub>  |
| C10    | 123.75 <sub>6</sub>  |
| C11    | 121.17 <sub>1</sub>  |

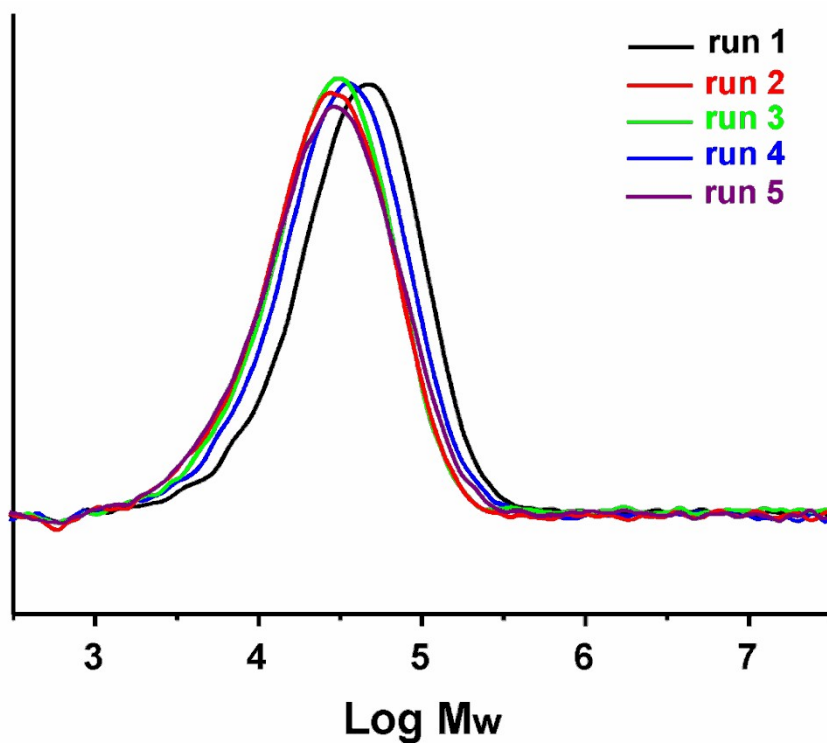

S6. GPC traces of runs 1-5.

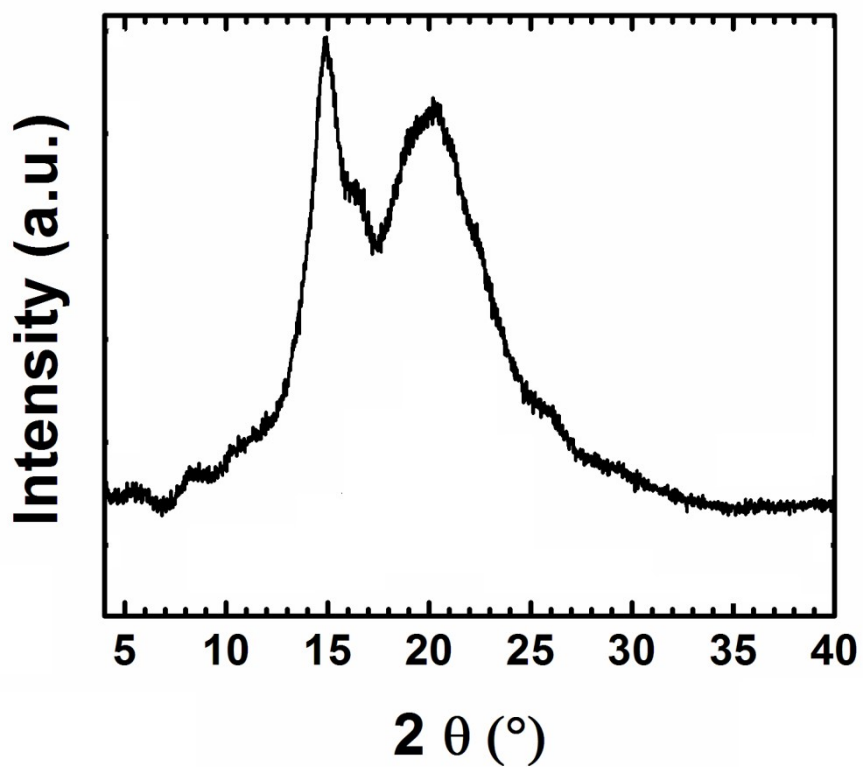

S7. X ray diffraction pattern of PPK (run 5).

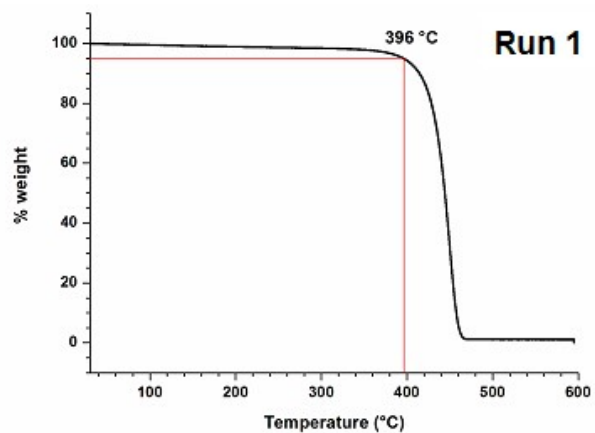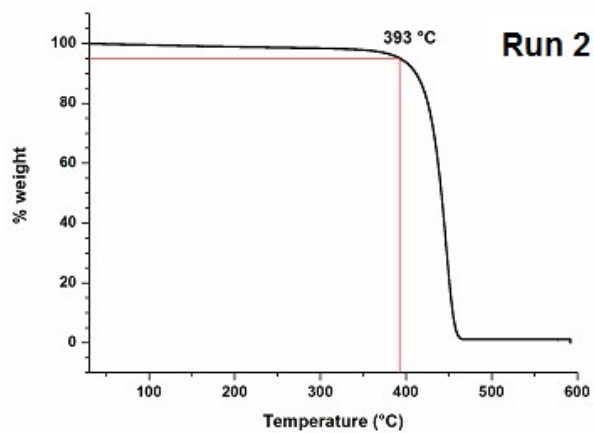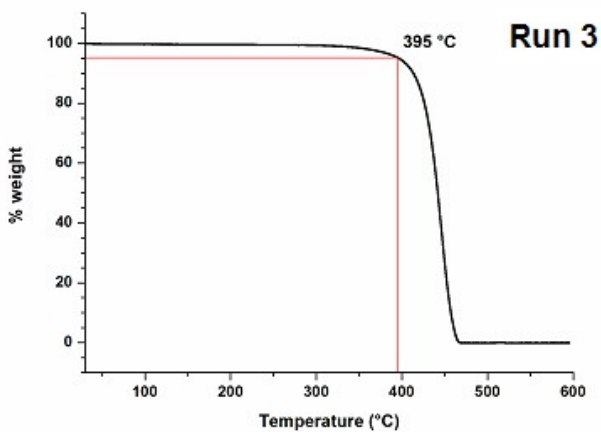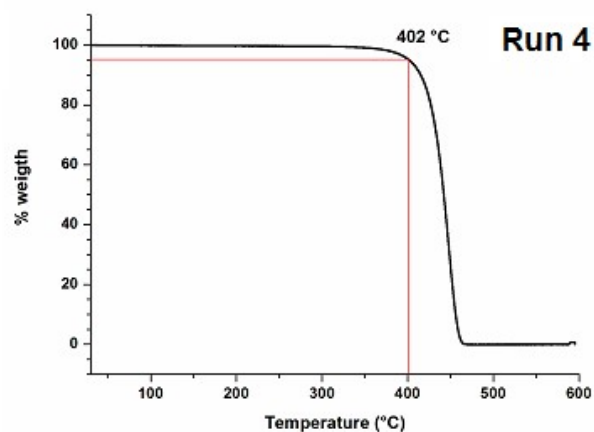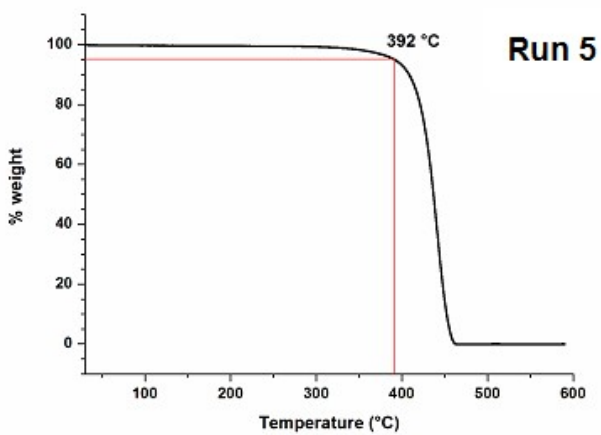

**S8.** TGA traces of runs 1-5 (N<sub>2</sub>, 10°C/min).

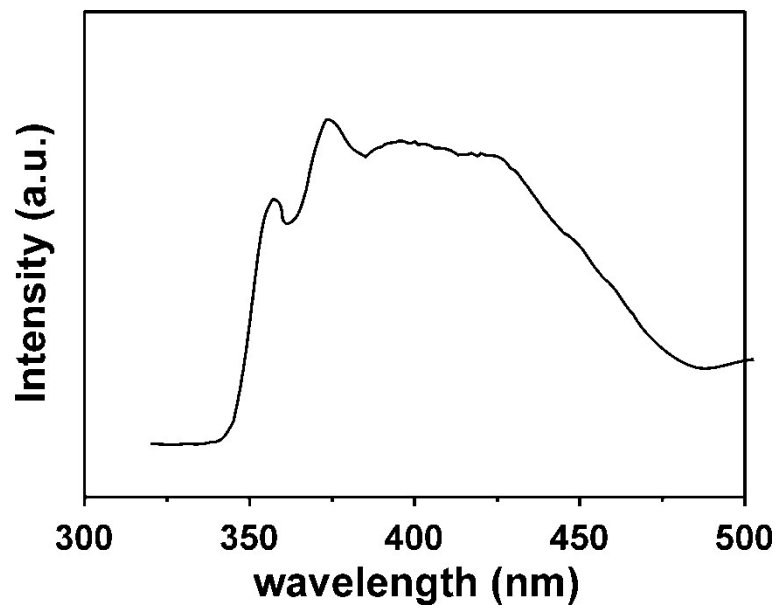

S9. Emission spectrum of PPK (run 5).  $\Lambda_{\text{ecc}} = 300$  nm.



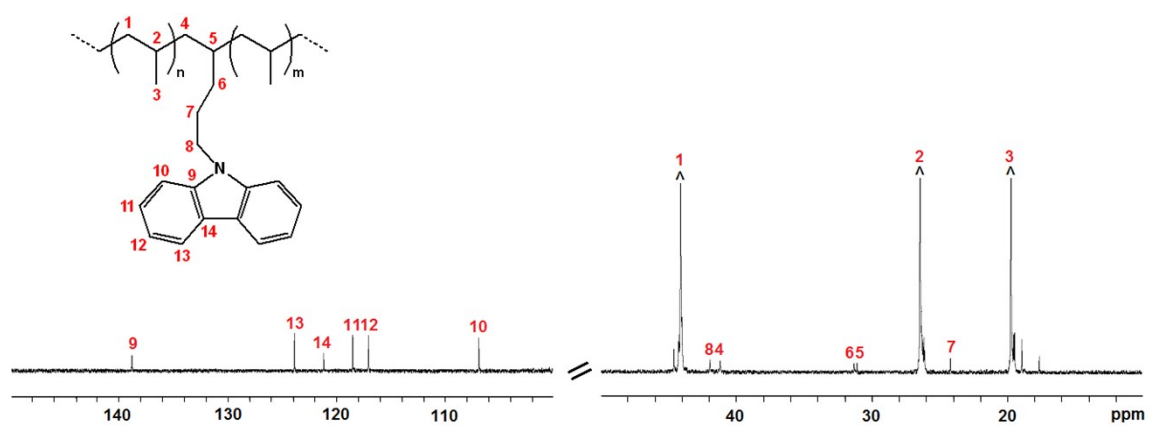

$^{13}\text{C}$  NMR spectrum of P(P-co-PK) (run 2) (TCDE solvent, HMDS scale, 100 °C).

**Table S2.**  $^{13}\text{C}$  NMR Assignments of Run 2

| Carbon | Chem. Shift<br>(ppm) |
|--------|----------------------|
| C1     | 44.06 <sub>8</sub>   |
| C2     | 26.41 <sub>4</sub>   |
| C3     | 19.79 <sub>9</sub>   |
| C4     | 41.11 <sub>9</sub>   |
| C5     | 31.01 <sub>7</sub>   |
| C6     | 31.28 <sub>6</sub>   |
| C7     | 24.26 <sub>9</sub>   |
| C8     | 41.96 <sub>7</sub>   |
| C9     | 138.77 <sub>1</sub>  |
| C10    | 106.93 <sub>1</sub>  |
| C11    | 118.52 <sub>6</sub>  |
| C12    | 117.05 <sub>6</sub>  |
| C13    | 123.87 <sub>1</sub>  |
| C14    | 121.13 <sub>2</sub>  |
